# Supplementary material
Source: PubMed Central journal article supplement (PMC6643844)
Supplement: ao7b00639_si_001.pdf [file ao7b00639_si_001.pdf]

# **Role of Cys<sub>I</sub>-Cys<sub>III</sub> disulfide bond on structure and activity of $\alpha$ -conotoxins at human neuronal nicotinic acetylcholine receptors**

Nargis Tabassum<sup>1,5†</sup>, Han-Shen Tae<sup>2†</sup>, Xinying Jia<sup>3</sup>, Quentin Kaas<sup>4</sup>, Tao Jiang<sup>1</sup>, David J. Adams<sup>2\*</sup> and Riley Yu<sup>1,5\*</sup>

<sup>1</sup>Key Laboratory of Marine Drugs, Chinese Ministry of Education, School of Medicine and Pharmacy, Ocean University of China, Qingdao 266003, China

<sup>2</sup>Illawarra Health and Medical Research Institute (IHMRI), University of Wollongong, Wollongong, NSW 2522, Australia

<sup>3</sup>The Centre for Advanced Imaging, The University of Queensland, Brisbane, QLD 4072, Australia.

<sup>4</sup>Institute for Molecular Bioscience, The University of Queensland, Brisbane, QLD 4072, Australia

<sup>5</sup>Laboratory for Marine Drugs and Bioproducts of Qingdao National Laboratory for Marine Science and Technology, Qingdao 266003, China

†These authors contribute equally to this work.

\*Corresponding authors: [djadams@uow.edu.au](mailto:djadams@uow.edu.au); [ryu@ouc.edu.cn](mailto:ryu@ouc.edu.cn)

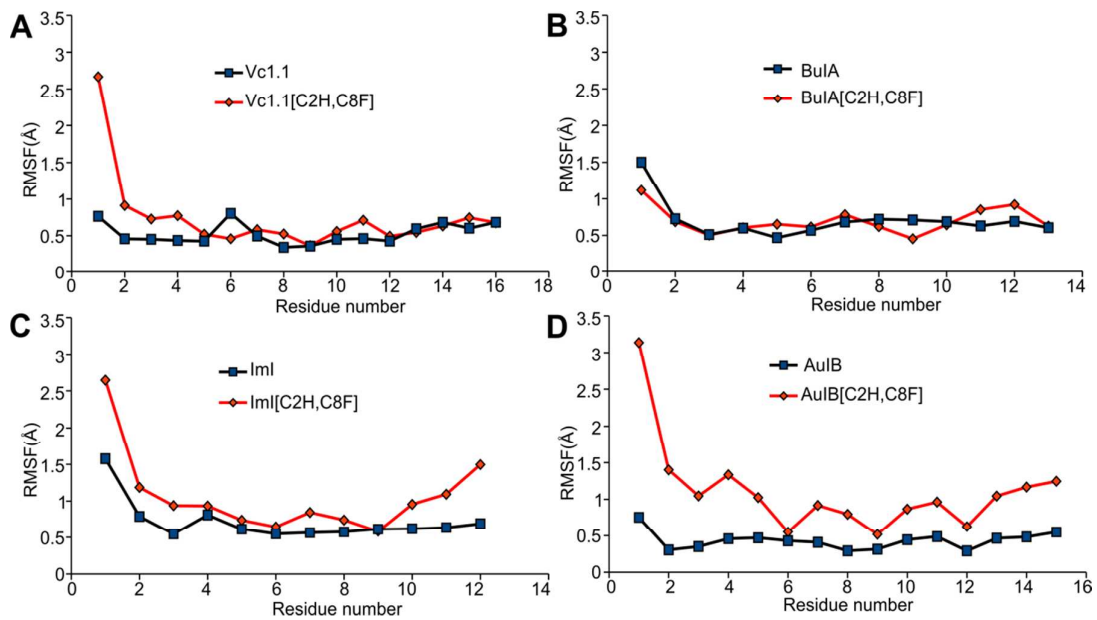

**Figure S1. Stability of the wild-type  $\alpha$ -conotoxins Vc1.1, BuIA, ImI and AuIB and their disulfide-deleted analogues.** (A-D) Backbone RMSF of the wild-type (black line) and mutant (red line) conotoxins.

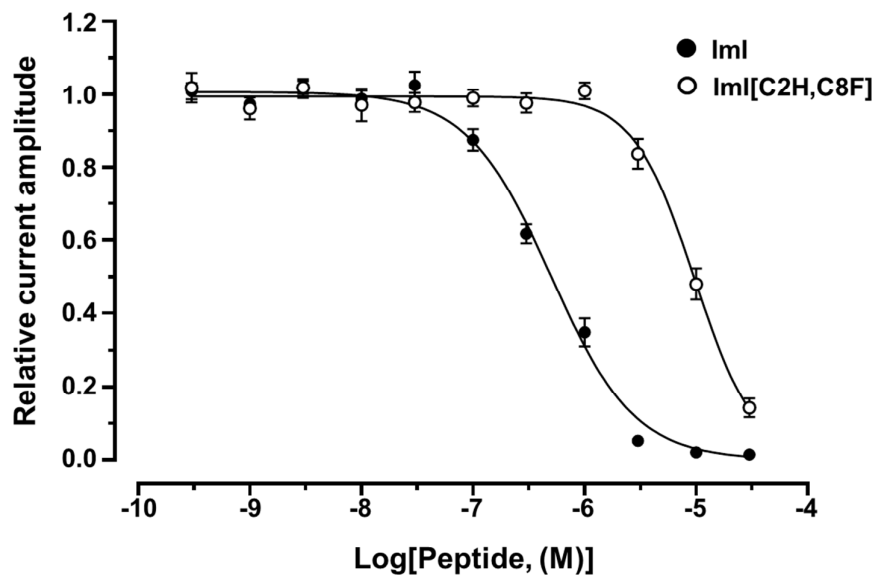

**Figure S2. Inhibition of human  $\alpha 7$  nAChR subtype by ImI and ImI[C2H,C8F].** Concentration-response curves of ImI and ImI[C2H,C8F] inhibition of ACh-evoked currents mediated by  $h\alpha 7$  nAChR. Curves fitted to the concentration–response relationships obtained for ImI and ImI[C2H,C8F] gave  $IC_{50}$  values of  $497 \pm 32$  nM and  $9.59 \pm 0.62$   $\mu$ M (mean  $\pm$  SEM,  $n = 5-12$ ), respectively.

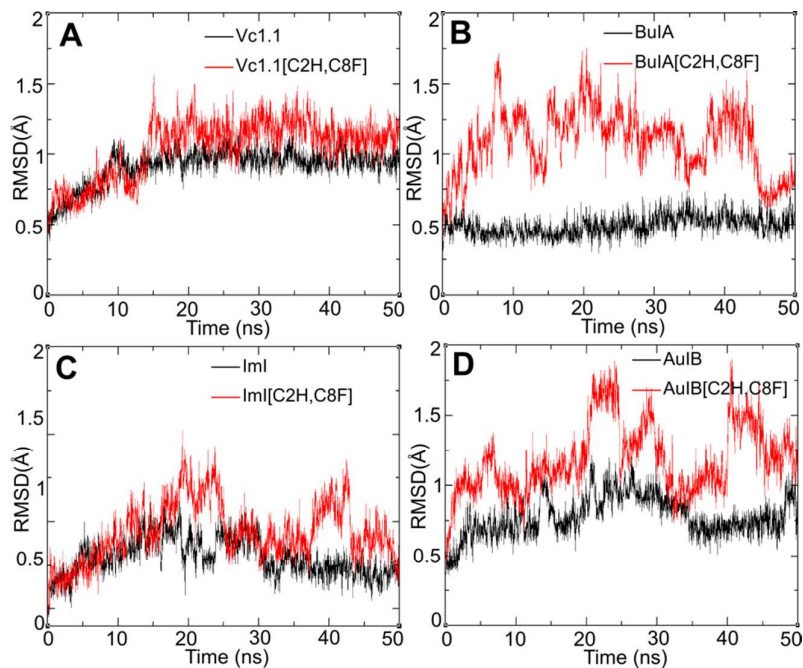

**Figure S3. Comparison of the backbone root mean square deviation (RMSD) of the wild type  $\alpha$ -conotoxins Vc1.1, BuIA, ImI and AuIB (black line) and their disulphide-deleted analogues (red line) in the nAChR-bound state.** A) RMSD of Vc1.1 and Vc1.1[C2H,C8F] calculated on the two  $\alpha 10(+)\alpha 9(-)$  binding sites of the  $\alpha 9\alpha 10$  nAChR. (B) RMSD of BuIA and BuIA[C2H,C8F] analogue calculated on the two  $\alpha 3(+)\beta 2(-)$  binding sites of the  $\alpha 3\beta 2$  nAChR. (C) RMSD of ImI and ImI[C2H,C8F] calculated on the five  $\alpha 7(+)\alpha 7(-)$  binding sites of the  $\alpha 7$  nAChR. (D) RMSD of AuIB and AuIB[C2H,C8F] calculated on the two  $\alpha 3(+)\beta 4(-)$  binding sites of the  $\alpha 3\beta 4$  nAChR.
